# Supplementary material
Source: MDPI journal article supplement (https://www.mdpi.com/2073-4344/12/9/973)
Supplement: s1 [file s1]

# Modified Magnesium Alkyls for Ziegler–Natta Catalysts

Julia Felicitas Schwarz <sup>1</sup>, Thorsten Holtrichter-Rößmann <sup>2</sup>, Claus Günter Liedtke <sup>2</sup>, Diddo Diddens <sup>3</sup> and Christian Paulik <sup>1,\*</sup>

<sup>1</sup> Institute for Chemical Technology of Organic Materials, Johannes Kepler University (JKU), Altenberger Strasse 69, 4040 Linz, Austria

<sup>2</sup> Lanxess Organometallics GmbH, Ernst-Schering-Straße 14, 59192 Bergkamen, Germany

<sup>3</sup> Forschungszentrum Jülich GmbH, Helmholtz-Institute Münster (IEK-12), Corrensstraße 46, 48149 Münster, Germany

\* Correspondence: christian.paulik@jku.at

## 1. Effect of heterocumulenes and butyl octyl magnesium (BOMAG)

In Table S1 the observations and exact values of the BOMAG amount, additive concentration and viscosities are listed.

**Table S1.** Exact values for the used magnesium alkyl butyl octyl magnesium (20.4% in heptane), the values for the additive concentration, the viscosities and visual observations.

| Entry | $m_{\text{BOMAG}}$<br>(g) | Additive                                                                            | $w_{\text{mol}}$<br>(mol%) | $T_{\text{increase}}$<br>(°C) | Color     | Sold for-<br>mation | $\eta$<br>(mPa s) |
|-------|---------------------------|-------------------------------------------------------------------------------------|----------------------------|-------------------------------|-----------|---------------------|-------------------|
| 1     | -                         | no additive                                                                         | -                          | -                             | colorless | x                   | 40.0              |
| 2     | 19.37                     | 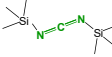 | 2.51                       | 1.1                           | colorless | x                   | 7.7               |
| 3     | 14.59                     |  | 2.66                       | 2.5                           | colorless | x                   | 10.2              |
| 4     | 21.06                     |  | 2.49                       | 0                             | colorless | x                   | 10.3              |
| 5     | 18.50                     |  | 2.28                       | 1.9                           | colorless | x                   | 10.7              |
| 6     | 24.30                     |  | 2.50                       | 3.3                           | colorless | x                   | 12.6              |
| 7     | 25.27                     |  | 2.50                       | -0.3                          | yellow    | x                   | 18.2              |
| 8     | 23.68                     |  | 2.80                       | 1.6                           | yellow    | x                   | 24.5              |
| 9     | 13.68                     |  | 2.42                       | 1.8                           | yellow    | x                   | 32.8              |
| 10    | 26.86                     |  | 2.55                       | 2.5                           | yellow    | x                   | 36.0              |
| Entry | $m_{\text{BOMAG}}$<br>(g) | Additive                                                                            | $w_{\text{mol}}$<br>(mol%) | $T_{\text{increase}}$<br>(°C) | Color     | Sold for-<br>mation | $\eta$<br>(mPa s) |

|    |       |                                                                                   |      |      |           |     |      |
|----|-------|-----------------------------------------------------------------------------------|------|------|-----------|-----|------|
| 11 | 25.53 | 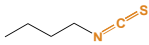 | 2.90 | 2.3  | yellow    | x   | 37.0 |
| 12 | 22.62 |  | 4.10 | 3.1  | yellow    | x   | 40.0 |
| 13 | 20.22 |  | 2.25 | 0.4  | yellow    | x   | 49.0 |
| 14 | 23.39 |  | 2.39 | 1.7  | colorless | yes | 39.3 |
| 15 | 24.44 |  | 4.26 | 3.7  | colorless | yes | 47.8 |
| 16 | 22.22 | $\text{S}=\text{C}=\text{S}$                                                      | 4.7  | -0.2 | colorless | x   | 25.9 |
| 17 | 21.50 |  | 2.48 | 2.4  | colorless | x   | 8.3  |

<sup>1</sup> polymer bonded, 200-400 mesh, 2 % cross-linked with divinylbenzene, 0.139 g were used

## 2. Viscosity data

In Table S2 the viscosity data for the magnesium alkyls BOMAG and BEM are listed, unmodified and modified with trimethylsilyl carbodiimide and triethylaluminum (each 2.5 mol%) at different alkyl concentrations in heptane.

**Table S2.** Viscosity data for butyl ethyl magnesium (BEM) and butyl octyl magnesium (BOMAG) with and without additives (2.5 mol% each) at different alkyl concentrations. The graphic can be seen in Figure 3 of the article.

| Entry | Alkyl | Additive                    | $w_{\text{Mg}}$ (wt%) | $w_{\text{Alkyl}}$ (wt%) | $\eta$ (mPa s) |
|-------|-------|-----------------------------|-----------------------|--------------------------|----------------|
| 1     | BEM   | -                           | 1.10                  | 4.98                     | 2.46           |
| 2     | BEM   | -                           | 2.18                  | 9.93                     | 8.33           |
| 3     | BEM   | -                           | 3.38                  | 15.37                    | 26.73          |
| 4     | BEM   | -                           | 4.39                  | 19.95                    | 61.8           |
| 5     | BEM   | -                           | 5.50                  | 25.01                    | 147.0          |
| 6     | BEM   | -                           | 6.81                  | 30.95                    | 385.5          |
| 7     | BEM   | -                           | 7.30                  | 33.20                    | 609.0          |
| 8     | BOMAG | -                           | 1.50                  | 10.31                    | 8.28           |
| 9     | BOMAG | -                           | 2.22                  | 15.26                    | 17.08          |
| 10    | BOMAG | -                           | 3.00                  | 20.41                    | 40.20          |
| 11    | BOMAG | -                           | 3.64                  | 25.02                    | 72.38          |
| 12    | BOMAG | -                           | 4.32                  | 29.69                    | 142.6          |
| 13    | BOMAG | -                           | 5.25                  | 36.08                    | 305.3          |
| 14    | BEM   | trimethylsilyl carbodiimide | 1.10                  | 5.00                     | 1.43           |
| 15    | BEM   | trimethylsilyl carbodiimide | 2.20                  | 10.02                    | 2.54           |
| 16    | BEM   | trimethylsilyl carbodiimide | 3.28                  | 14.90                    | 4.82           |
| 17    | BEM   | trimethylsilyl carbodiimide | 4.40                  | 20.01                    | 9.68           |
| 18    | BEM   | trimethylsilyl carbodiimide | 5.48                  | 24.93                    | 17.68          |
| 19    | BEM   | trimethylsilyl carbodiimide | 6.59                  | 30.00                    | 32.83          |

|    |       |                             |      |       |       |
|----|-------|-----------------------------|------|-------|-------|
| 20 | BEM   | trimethylsilyl carbodiimide | 7.30 | 33.20 | 47.4  |
| 21 | BOMAG | trimethylsilyl carbodiimide | 0.73 | 5.00  | 1.14  |
| 22 | BOMAG | trimethylsilyl carbodiimide | 1.45 | 10.00 | 2.27  |
| 23 | BOMAG | trimethylsilyl carbodiimide | 2.18 | 14.95 | 4.04  |
| 24 | BOMAG | trimethylsilyl carbodiimide | 2.90 | 19.91 | 7.62  |
| 25 | BOMAG | trimethylsilyl carbodiimide | 3.63 | 24.97 | 14.05 |
| 26 | BOMAG | trimethylsilyl carbodiimide | 4.37 | 30.01 | 24.99 |
| 27 | BOMAG | trimethylsilyl carbodiimide | 5.13 | 35.26 | 46.32 |
| 28 | BEM   | triethylaluminum            | 1.10 | 5.00  | 1.10  |
| 29 | BEM   | triethylaluminum            | 2.20 | 9.99  | 2.28  |
| 30 | BEM   | triethylaluminum            | 3.30 | 14.98 | 4.37  |
| 31 | BEM   | triethylaluminum            | 4.17 | 18.95 | 7.23  |
| 32 | BEM   | triethylaluminum            | 5.50 | 24.99 | 15.74 |
| 33 | BEM   | triethylaluminum            | 6.59 | 29.96 | 28.71 |
| 34 | BEM   | triethylaluminum            | 7.30 | 33.20 | 38.94 |

| Entry | Alkyl | Additive         | $w_{\text{Mg}}$ (wt%) | $w_{\text{Alkyl}}$ (wt%) | $\eta$ (mPa s) |
|-------|-------|------------------|-----------------------|--------------------------|----------------|
| 35    | BOMAG | triethylaluminum | 0.73                  | 5.05                     | 1.10           |
| 36    | BOMAG | triethylaluminum | 1.42                  | 9.73                     | 3.06           |
| 37    | BOMAG | triethylaluminum | 2.16                  | 14.86                    | 3.45           |
| 38    | BOMAG | triethylaluminum | 2.91                  | 20.02                    | 6.33           |
| 39    | BOMAG | triethylaluminum | 3.63                  | 24.97                    | 11.37          |
| 40    | BOMAG | triethylaluminum | 4.36                  | 29.98                    | 20.37          |
| 41    | BOMAG | triethylaluminum | 5.13                  | 35.26                    | 37.74          |

In Table S3 the effect of the additive concentration on the viscosity of a 33.2% BEM solution in heptane is given.

**Table S3.** Viscosity data for figure 4 in the article for a 33.2% BEM solution in heptane and different additive concentrations.

| Entry | Additive                    | $w_{\text{additive}}$ (mol%) | $\eta$ (mPa s) | Entry | Additive          | $w_{\text{additive}}$ (mol%) | $\eta$ (mPa s) |
|-------|-----------------------------|------------------------------|----------------|-------|-------------------|------------------------------|----------------|
| 1     | trimethylsilyl carbodiimide | 0                            | 609            | 9     | triethyl aluminum | 0                            | 609            |
| 2     |                             | 1.04                         | 156.4          | 10    |                   | 0.93                         | 150            |
| 3     |                             | 2.48                         | 47.4           | 11    |                   | 2.46                         | 38.95          |
| 4     |                             | 2.04                         | 89.3           | 12    |                   | 3.85                         | 19.41          |
| 5     |                             | 3.88                         | 31.8           | 13    |                   | 5.81                         | 10.23          |
| 6     |                             | 5.58                         | 17.22          | 14    |                   | 7.64                         | 6.75           |
| 7     |                             | 7.38                         | 11.22          | 15    |                   | 9.10                         | 4.91           |
| 8     |                             | 9.17                         | 7.5            |       |                   |                              |                |

### 3. Polymerization data

Figure S1 shows the molecular weight distributions of the obtained polymers and Figure S2 displays the schematic drawing of the used 0.5 L polymerization reactor.

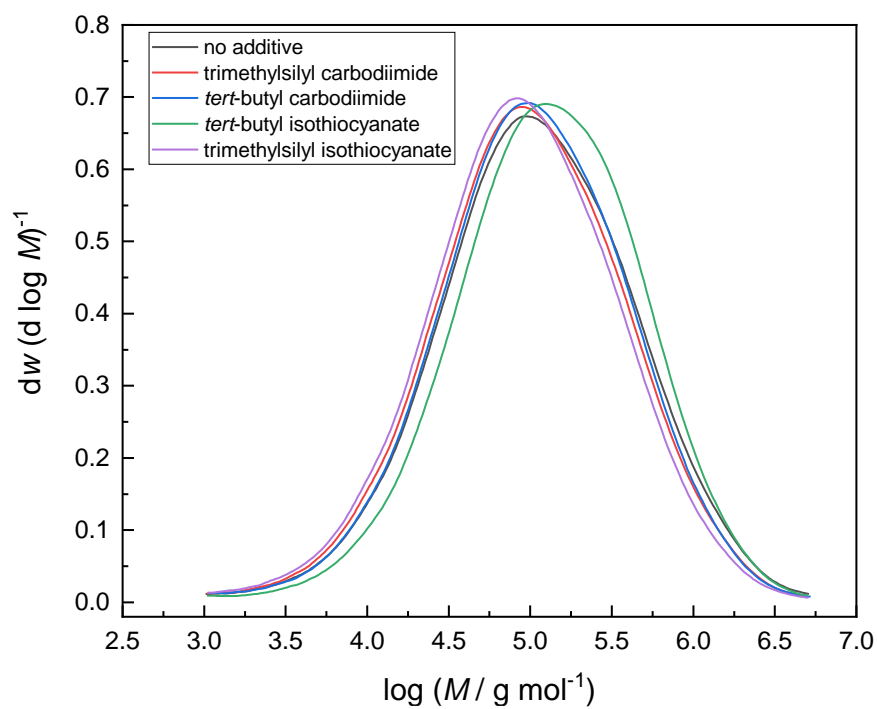

**Figure S1.** Molecular weight distributions for the obtained polymers measured with HT-SEC.

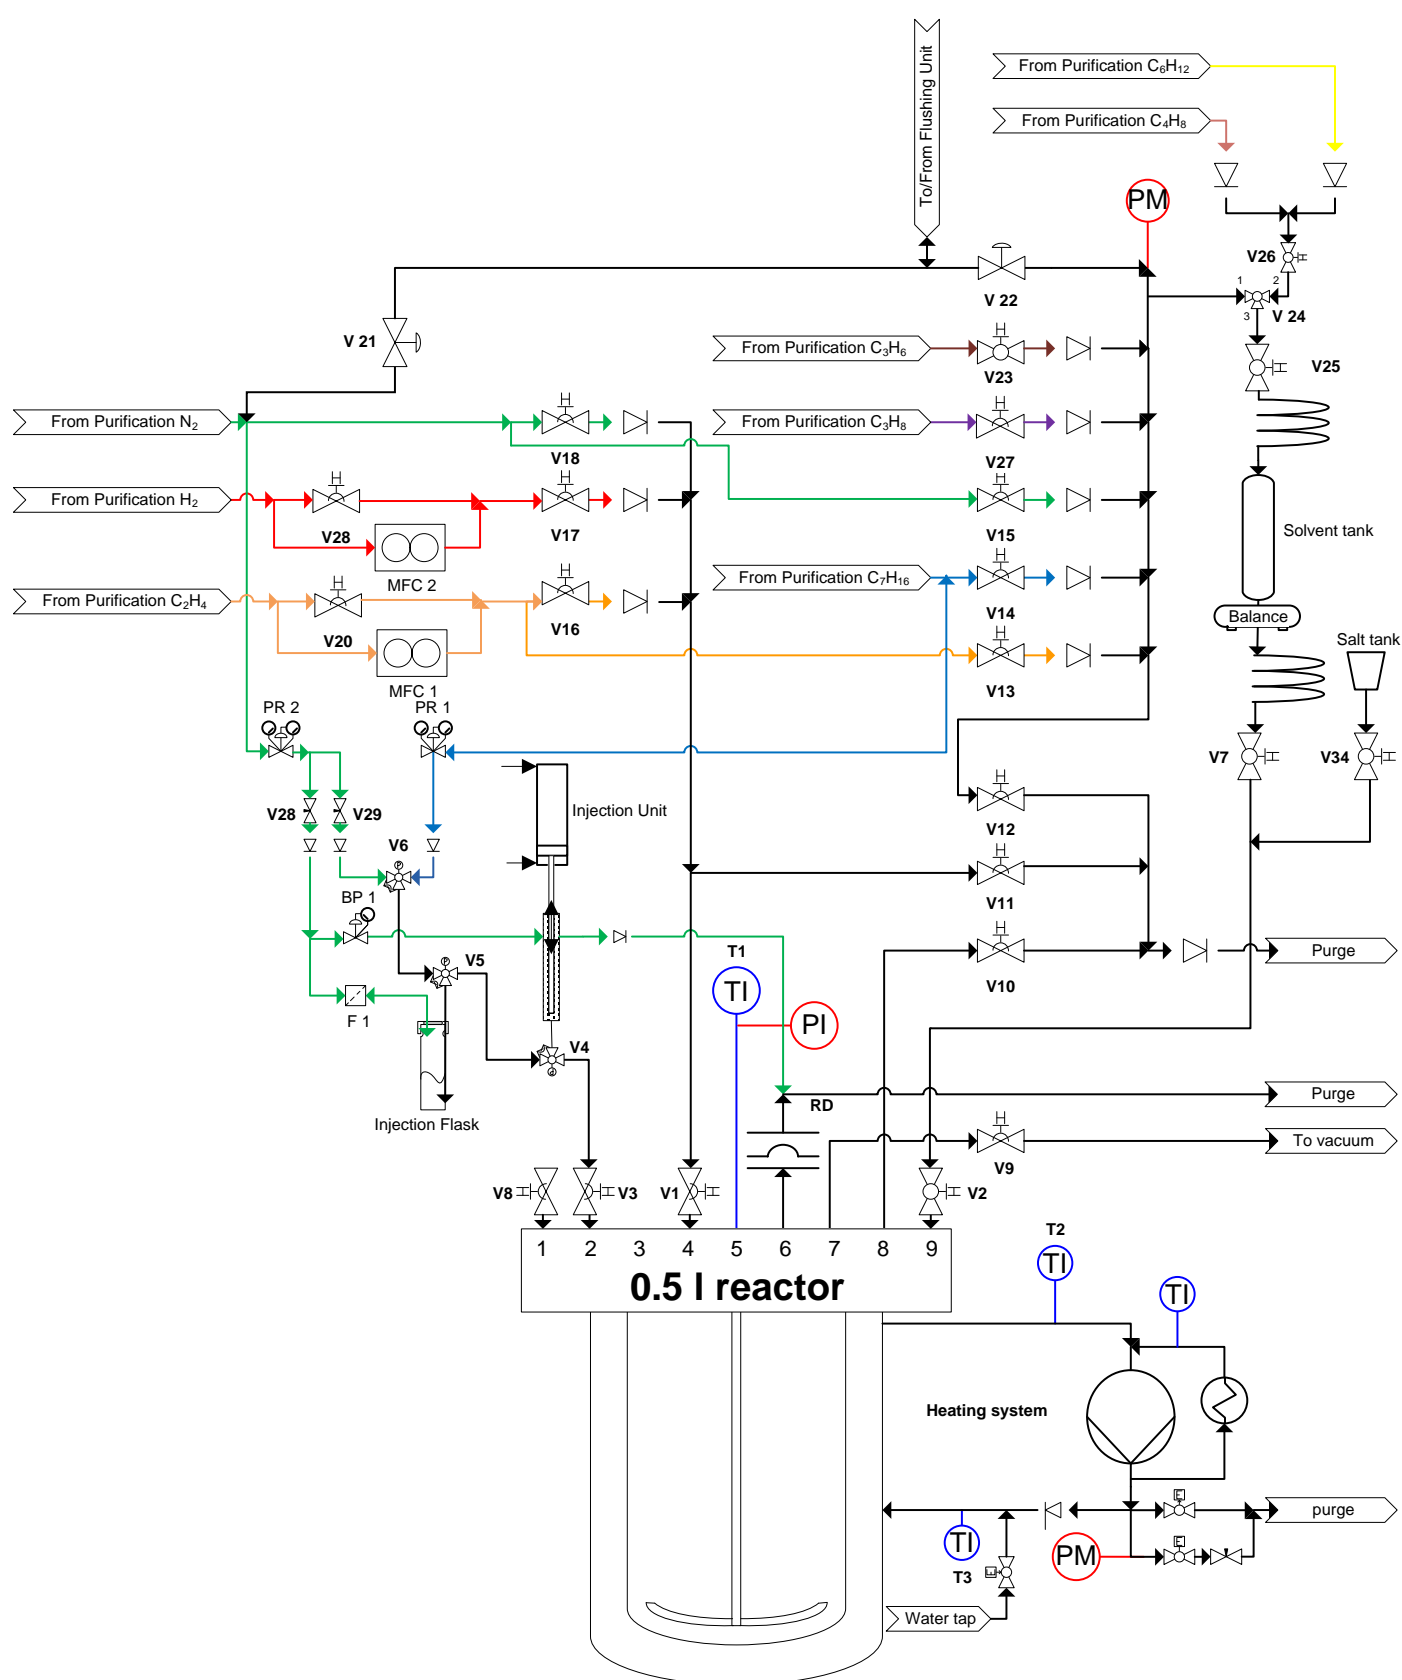

**Figure S2.** Schematic drawing of the 0.5 L reactor setup used for the polymerization experiments.
